# Supplementary material
Source: PubMed Central journal article supplement (PMC2859194)
Supplement: NIHMS194824-supplement-Table_S1.pdf [file NIHMS194824-supplement-Table_S1.pdf]

Supplemental Table 1. Number of unique peptides and emPAI values of parental samples (M, F) in total hair

| Protein name                        | Matches | Accession num   | MW (AMU)   | Cell Loc | Total Hair Shaft |    |    |
|-------------------------------------|---------|-----------------|------------|----------|------------------|----|----|
|                                     |         |                 |            |          | D                | S  | M  |
| KRT86 Keratin type II cuticular Hk  | 1       | IPI00182655     | 53,481.90  | Ker      | 86               | 86 | 90 |
| KRT33B Keratin, type I cuticular Hk | 2       | IPI00031423,IPI | 46,195.50  | Ker      | 48               | 43 | 56 |
| KRT85 Keratin type II cuticular Hk  | 1       | IPI00032541     | 55,784.00  | Ker      | 42               | 45 | 38 |
| KRT82 Keratin type II cuticular Hk  | 1       | IPI00300053     | 56,635.30  | Ker      | 21               | 15 | 11 |
| KRT35 keratin 35                    | 1       | IPI00294649     | 50,342.90  | Ker      | 19               | 13 | 13 |
| DSP Isoform DPI of Desmoplakin      | 1       | IPI00013933     | 331,763.40 | Mem      | 16               | 19 | 10 |
| KRT31 51 kDa protein                | 1       | IPI00796364     | 50,650.00  | Ker      | 15               | 15 | 19 |
| KRT32 Keratin, type I cuticular Hk  | 1       | IPI00291540     | 50,300.30  | Ker      | 10               | 9  | 10 |
| KRT34 keratin 34                    | 2       | IPI00292715,IPI | 49,405.60  | Ker      | 15               | 19 | 15 |
| VSIG8 V-set and immunoglobulin      | 1       | IPI00376274     | 43,871.80  | Mem      | 8                | 4  | 5  |
| HIST1H2BL Histone H2B type 1-L      | 11      | IPI00018534,IPI | 13,934.70  | His      | 5                | 3  | 4  |
| JUP JUP protein                     | 1       | IPI00789324     | 81,709.90  | Mem      | 11               | 9  | 6  |
| HIST1H4H;HIST1H4I;HIST1H4J;HIST1H4K | 1       | IPI00453473     | 11,349.70  | His      | 6                | 5  | 3  |
| KRT81 Keratin type II cuticular Hk  | 1       | IPI00760863     | 54,952.80  | Ker      | 5                | 5  | 6  |
| DSG4 Isoform 2 of Desmoglein-4      | 2       | IPI00428691,IPI | 115,434.70 | Mem      | 5                | 7  | 7  |
| ENSP00000381495 (KRTAP2-2)          | 2       | IPI00455354,IPI | 13,507.10  | Ker      | 13               | 13 | 11 |
| SFN Isoform 1 of 14-3-3 protein s   | 1       | IPI00013890     | 27,756.80  | Cyt      | 6                | 3  | 3  |
| KRT40 type I hair keratin KA36      | 1       | IPI00552959     | 48,120.60  | Ker      | 6                | 3  | 4  |
| H2AFX Histone H2A.x                 | 1       | IPI00219037     | 15,127.10  | His      | 6                | 6  | 6  |
| PKP1 Isoform 2 of Plakophilin-1     | 2       | IPI00071509,IPI | 82,844.70  | Mem      | 2                | 0  | 2  |
| KRT83 Keratin type II cuticular Hk  | 1       | IPI00297795     | 54,195.90  | Ker      | 9                | 5  | 2  |
| KRT39 type I hair keratin KA35      | 1       | IPI00741855     | 55,633.40  | Ker      | 10               | 13 | 7  |
| KRTAP11-1 Keratin-associated pr     | 1       | IPI00216711     | 17,065.90  | Ker      | 4                | 4  | 3  |
| ENSP00000375147 (KRTAP analo        | 1       | IPI00791014     | 53,888.60  | Ker      | 3                | 3  | 2  |
| SELENBP1 Selenium-binding prot      | 2       | IPI00012303,IPI | 52,374.00  | Cyt      | 6                | 4  | 3  |
| S100A3 Protein S100-A3              | 1       | IPI00016752     | 11,695.30  | Cyt      | 5                | 4  | 4  |
| CALML3 Calmodulin-like protein      | 1       | IPI00216984     | 16,872.80  | Cyt      | 0                | 2  | 2  |
| HSPA2 Heat shock-related 70 kDa     | 1       | IPI00007702     | 70,005.00  | Cyt      | 0                | 0  | 0  |
| KRTAP24-1 Keratin-associated pr     | 1       | IPI00414750     | 27,700.90  | Ker      | 0                | 0  | 0  |
| KRTAP4-9 Keratin-associated pro     | 1       | IPI00105153     | 22,383.90  | Ker      | 10               | 9  | 5  |
| GAPDH Glyceraldehyde-3-phosph       | 1       | IPI00219018     | 36,035.30  | Cyt      | 4                | 4  | 2  |
| TGM3 Protein-glutamine gamma        | 1       | IPI00300376     | 76,615.00  | Cyt      | 3                | 0  | 3  |
| LRR15 Leucine-rich repeat-cont      | 1       | IPI00152871     | 64,380.40  | Mem      | 0                | 2  | 3  |
| TUBA1A Tubulin alpha-1A chain       | 1       | IPI00180675     | 50,117.70  | Cyt      | 2                | 3  | 3  |
| KRT36 Keratin, type I cuticular Hk  | 1       | IPI00008692     | 52,229.00  | Ker      | 2                | 2  | 2  |
| PRDX6 Peroxiredoxin-6               | 1       | IPI00220301     | 25,018.10  | Cyt      | 2                | 0  | 0  |
| FAM26D Isoform 1 of Protein FAI     | 1       | IPI00065530     | 35,042.60  | Mem      | 0                | 0  | 0  |
| LYG2 Lysozyme g-like protein 2 p    | 1       | IPI00328398     | 23,480.70  | Cyt      | 0                | 0  | 0  |
| KRTAP3-1 Keratin-associated pro     | 1       | IPI00011212     | 10,520.80  | Ker      | 4                | 5  | 6  |
| AHNAK Neuroblast differentiatio     | 1       | IPI00021812     | 629,086.40 | Mem      | 0                | 0  | 0  |
| KRT38 Keratin, type I cuticular Hk  | 1       | IPI00297641     | 50,472.00  | Ker      | 8                | 5  | 4  |
| EEF1A1 Elongation factor 1-alpha    | 2       | IPI00396485,IPI | 50,123.20  | Cyt      | 0                | 0  | 0  |
| KRTAP10-9 Keratin-associated pr     | 1       | IPI00429312     | 29,954.60  | Ker      | 0                | 0  | 0  |

|                                    |    |                 |            |     |   |   |   |
|------------------------------------|----|-----------------|------------|-----|---|---|---|
| TUBB2A Tubulin beta-2A chain       | 2  | IPI00013475,IPI | 49,889.10  | Cyt | 4 | 3 | 2 |
| ACTB Actin, cytoplasmic 1          | 3  | IPI00021439,IPI | 41,719.80  | Cyt | 0 | 0 | 0 |
| HEPHL1 hephaestin-like 1           | 1  | IPI00848044     | 131,588.80 | Mem | 3 | 0 | 0 |
| KRTAP13-2 Keratin-associated pr    | 1  | IPI00373959     | 18,708.80  | Ker | 8 | 4 | 3 |
| ANXA2 annexin A2 isoform 1         | 2  | IPI00418169,IPI | 40,395.30  | Cyt | 0 | 0 | 0 |
| ATP5B ATP synthase subunit beta    | 1  | IPI00303476     | 56,542.50  | Cyt | 2 | 2 | 2 |
| KRT33A keratin 33A                 | 1  | IPI00419574     | 45,922.10  | Ker | 3 | 3 | 3 |
| YWHAE 14-3-3 protein epsilon       | 1  | IPI00000816     | 29,157.00  | Cyt | 2 | 2 | 0 |
| UBB;UBC;RPS27A ubiquitin and ri    | 24 | IPI00179330,IPI | 17,947.60  | Cyt | 0 | 0 | 0 |
| KRTAP9-3 Keratin-associated pro    | 1  | IPI00011222     | 16,833.00  | Ker | 6 | 4 | 2 |
| KRTAP10-11;KRTAP10-10 Keratin      | 1  | IPI00394674     | 30,243.80  | Ker | 0 | 0 | 0 |
| KRTAP1-5 Keratin-associated pro    | 1  | IPI00011211     | 17,990.50  | Ker | 6 | 4 | 4 |
| EEF2 Elongation factor 2           | 1  | IPI00186290     | 95,322.10  | Cyt | 0 | 0 | 0 |
| HIST1H1C Histone H1.2              | 1  | IPI00217465     | 21,347.80  | His | 0 | 0 | 0 |
| KRTAP10-12 Keratin-associated p    | 1  | IPI00394683     | 25,086.00  | Ker | 0 | 0 | 0 |
| LAP3 Isoform 1 of Cytosol amino    | 2  | IPI00419237,IPI | 56,149.70  | Cyt | 0 | 0 | 0 |
| ATP5A1 ATP synthase subunit alp    | 1  | IPI00440493     | 59,734.10  | Cyt | 0 | 2 | 0 |
| PABPC1 Isoform 1 of Polyadenyla    | 2  | IPI00008524,IPI | 70,653.30  | Cyt | 0 | 0 | 0 |
| ENO1 Isoform Alpha enolase         | 1  | IPI00465248     | 47,152.20  | Cyt | 0 | 0 | 0 |
| TPI1 Isoform 1 of Triosephosphat   | 2  | IPI00465028,IPI | 30,772.80  | Cyt | 0 | 0 | 0 |
| LGALS3 Galectin-3                  | 1  | IPI00465431     | 26,170.80  | Cyt | 0 | 0 | 0 |
| FABP4 Fatty acid-binding protein   | 1  | IPI00215746     | 14,700.70  | Cyt | 0 | 0 | 0 |
| KRTAP3-2 Keratin-associated pro    | 1  | IPI00011214     | 10,388.60  | Ker | 2 | 3 | 3 |
| CTNNB1 Isoform 1 of Catenin bet    | 1  | IPI00017292     | 85,479.00  | Mem | 0 | 0 | 0 |
| AIM1 Absent in melanoma 1 prot     | 1  | IPI00294840     | 188,659.10 | Cyt | 0 | 0 | 0 |
| KRTAP1-3;LOC728951 Keratin-as      | 2  | IPI00439630,IPI | 18,163.40  | Ker | 3 | 4 | 2 |
| PPL Periplakin                     | 1  | IPI00298057     | 204,631.90 | Mem | 0 | 0 | 0 |
| TXNRD1 Thioredoxin reductase 1     | 2  | IPI00554786,IPI | 54,689.30  | Cyt | 0 | 0 | 0 |
| KRTAP12-1 Keratin-associated pr    | 1  | IPI00375324     | 9,717.90   | Ker | 0 | 0 | 0 |
| GNPMB Isoform 2 of Transmemb       | 2  | IPI00001592,IPI | 62,625.20  | Mem | 0 | 0 | 0 |
| SERPINB5 Serpin B5 precursor       | 1  | IPI00783625     | 42,122.10  | Cyt | 0 | 0 | 0 |
| HSPA5 HSPA5 protein                | 1  | IPI00003362     | 72,405.60  | Cyt | 0 | 0 | 0 |
| EIF4A1 Eukaryotic initiation facto | 3  | IPI00025491,IPI | 46,137.30  | Cyt | 0 | 0 | 0 |
| PLEC1 Isoform 1 of Plectin-1       | 9  | IPI00014898,IPI | 531,707.90 | Mem | 0 | 0 | 0 |
| HSD17B4 Peroxisomal multifunct     | 1  | IPI00019912     | 79,670.40  | Cyt | 0 | 0 | 0 |
| RPLP2 60S acidic ribosomal prote   | 1  | IPI00008529     | 11,647.40  | Cyt | 0 | 0 | 0 |
| HSP90AB1 Heat shock protein HS     | 1  | IPI00414676     | 83,249.30  | Cyt | 0 | 0 | 0 |
| ACADVL Isoform 1 of Very long-c    | 2  | IPI00028031,IPI | 75,192.90  | Cyt | 0 | 0 | 0 |
| ATG9B Autophagy-related protei     | 1  | IPI00465328     | 101,002.60 | Cyt | 0 | 0 | 0 |
| ARF1 ADP-ribosylation factor 1     | 2  | IPI00215914,IPI | 20,679.60  | Cyt | 0 | 0 | 0 |
| KRTAP4-7 Keratin-associated pro    | 1  | IPI00260838     | 22,469.20  | Ker | 2 | 0 | 2 |
| HSP90AA1 heat shock protein 90     | 3  | IPI00382470,IPI | 98,147.10  | Cyt | 0 | 0 | 0 |
| EEF1G Elongation factor 1-gamm     | 2  | IPI00000875,IPI | 50,101.40  | Cyt | 0 | 0 | 0 |

· shaft and cross-linked (insoluble) fractions; D and S are samples from affected offspring.

| des | emPAI values |        |        |        | emPAI Norm | Cross-Linked Number of Unique Peptides |    |     |        | emPAI values |       |       |  | emPAI Norm |
|-----|--------------|--------|--------|--------|------------|----------------------------------------|----|-----|--------|--------------|-------|-------|--|------------|
|     | M            | F      | Ave    |        |            | D                                      | S  | M   | F      | M            | F     | Ave   |  |            |
| 87  | 426.67       | 301.52 | 364.1  | 36.213 | 27         | 31                                     | 36 | 26  | 7.46   | 3.23         | 5.345 | 6.314 |  |            |
| 39  | 123.28       | 36.22  | 79.75  | 7.932  | 17         | 23                                     | 24 | 14  | 4.34   | 1.23         | 2.785 | 3.29  |  |            |
| 45  | 79.88        | 84.5   | 82.19  | 8.1747 | 16         | 13                                     | 18 | 16  | 6.83   | 5.27         | 6.05  | 7.147 |  |            |
| 17  | 2.35         | 4.2    | 3.275  | 0.3257 | 31         | 22                                     | 27 | 32  | 8.02   | 9.63         | 8.825 | 10.42 |  |            |
| 15  | 5.35         | 6.18   | 5.765  | 0.5734 | 22         | 16                                     | 20 | 22  | 9.39   | 7.64         | 8.515 | 10.06 |  |            |
| 23  | 0.11         | 0.25   | 0.18   | 0.0179 | 51         | 43                                     | 48 | 34  | 0.53   | 0.3          | 0.415 | 0.49  |  |            |
| 16  | 74.79        | 46.2   | 60.495 | 6.0169 | 5          | 9                                      | 8  | 6   | 4.83 * |              | 2.42  | 2.859 |  |            |
| 10  | 4.26         | 3.94   | 4.1    | 0.4078 | 18         | 15                                     | 15 | 13  | 16.98  | 8.14         | 12.56 | 14.84 |  |            |
| 13  | 30.15        | 15.67  | 22.91  | 2.2787 | 4          | 6                                      | 9  | 5   | 4.76   | 1.55         | 3.155 | 3.727 |  |            |
| 6   | 0.24         | 0.42   | 0.33   | 0.0328 | 16         | 10                                     | 10 | 18  | 1.85   | 2.09         | 1.97  | 2.327 |  |            |
| 4   | 1.4          | 1.99   | 1.695  | 0.1686 | 8          | 6                                      | 7  | 4   | 3.63   | 0.93         | 2.28  | 2.693 |  |            |
| 5   | 0.42         | 0.26   | 0.34   | 0.0338 | 18         | 16                                     | 16 | 12  | 0.66   | 0.53         | 0.595 | 0.703 |  |            |
| 4   | 0.7          | 1.88   | 1.29   | 0.1283 | 9          | 6                                      | 7  | 5   | 5.37   | 3.89         | 4.63  | 5.469 |  |            |
| 7   | 228.38       | 204.06 | 216.22 | 21.506 | 2          | 0                                      | 2  | 0   |        |              |       |       |  |            |
| 6   | 0.21         | 0.18   | 0.195  | 0.0194 | 14         | 13                                     | 11 | 6   | 0.32   | 0.09         | 0.205 | 0.242 |  |            |
| 12  | 7.83         | 9.77   | 8.8    | 0.8753 | 4          | 5                                      | 3  | 3   | 0.81 * |              | 0.405 | 0.478 |  |            |
| 2   | 0.25         | 0.12   | 0.185  | 0.0184 | 10         | 11                                     | 10 | 11  | 4.26   | 3.63         | 3.945 | 4.66  |  |            |
| 4   | 0.56         | 0.56   | 0.56   | 0.0557 | 6          | 5                                      | 6  | 7   | 0.66   | 0.89         | 0.775 | 0.915 |  |            |
| 5 * |              | 4.61   | 2.3    | 0.2288 | 5          | 6                                      | 6  | 7   | 3.58   | 3.63         | 3.605 | 4.258 |  |            |
| 0   |              |        |        |        | 10         | 12                                     | 12 | 10  | 0.87   | 0.76         | 0.815 | 0.963 |  |            |
| 11  | 69.81        | 110.53 | 90.17  | 8.9684 | 0          | 0                                      | 0  | 0   |        |              |       |       |  |            |
| 8   | 0.48         | 0.65   | 0.565  | 0.0562 | 6          | 4                                      | 4  | 4   | 0.25   | 0.18         | 0.215 | 0.254 |  |            |
| 5   | 0.65         | 1.31   | 0.98   | 0.0975 | 13         | 13                                     | 10 | 3   | 3.51   | 0.65         | 2.08  | 2.457 |  |            |
| 2   | 0.18         | 0.18   | 0.18   | 0.0179 | 5          | 4                                      | 5  | 8 * |        | *            |       |       |  |            |
| 7   | 0.2          | 0.52   | 0.36   | 0.0358 | 9          | 3                                      | 10 | 3   | 0.72   | 0.33         | 0.525 | 0.62  |  |            |
| 3   | 3.34         | 3.34   | 3.34   | 0.3322 | 3          | 4                                      | 4  | 3   | 3.34   | 1.08         | 2.21  | 2.611 |  |            |
| 2   | 0.44         | 0.44   | 0.44   | 0.0438 | 5          | 4                                      | 5  | 4   | 1.96   | 1.47         | 1.715 | 2.026 |  |            |
| 0   |              |        |        |        | 9          | 5                                      | 6  | 7   | 0.31   | 0.37         | 0.34  | 0.402 |  |            |
| 0   | 0.11         | 0.11   | 0.11   | 0.0109 | 2          | 0                                      | 2  | 2   | 0.11   | 0.24         | 0.175 | 0.207 |  |            |
| 6   | 0.6          | 1.02   | 0.81   | 0.0806 | 0          | 0                                      | 0  | 0   |        |              |       |       |  |            |
| 2   | 0.22         | 0.19   | 0.205  | 0.0204 | 3          | 3                                      | 4  | 4   | 0.49   | 0.54         | 0.515 | 0.608 |  |            |
| 3   | 0.13         | 0.13   | 0.13   | 0.0129 | 5          | 4                                      | 6  | 5   | 0.28   | 0.18         | 0.23  | 0.272 |  |            |
| 0   |              |        |        |        | 5          | 3                                      | 6  | 4   | 0.28   | 0.1          | 0.19  | 0.224 |  |            |
| 3 * |              | 0.21   | 0.105  | 0.0104 | 5          | 2                                      | 6  | 4   | 0.37 * |              | 0.185 | 0.219 |  |            |
| 2   | 0.93         | 1.17   | 1.05   | 0.1044 | 5          | 4                                      | 3  | 3   | 0.81   | 1.06         | 0.935 | 1.104 |  |            |
| 0   |              |        |        |        | 2          | 5                                      | 4  | 6   | 0.45   | 0.86         | 0.655 | 0.774 |  |            |
| 0   |              |        |        |        | 4          | 4                                      | 5  | 4   | 0.19   | 0.3          | 0.245 | 0.289 |  |            |
| 0   |              |        |        |        | 5          | 3                                      | 3  | 0   |        |              |       |       |  |            |
| 4   | 3.76         | 1.83   | 2.795  | 0.278  | 0          | 0                                      | 0  | 0   |        |              |       |       |  |            |
| 0   |              |        |        |        | 9          | 0                                      | 2  | 2   | 0.01   | 0.01         | 0.01  | 0.012 |  |            |
| 3   | 0.53         | 0.53   | 0.53   | 0.0527 | 0          | 0                                      | 0  | 0   |        |              |       |       |  |            |
| 0   |              |        |        |        | 5          | 4                                      | 4  | 6   | 0.39   | 0.49         | 0.44  | 0.52  |  |            |
| 0   |              |        |        |        | 2          | 2                                      | 0  | 3   |        |              |       |       |  |            |

|     |       |       |       |        |   |   |   |     |        |      |       |       |
|-----|-------|-------|-------|--------|---|---|---|-----|--------|------|-------|-------|
| 5   | 0.13  | 0.29  | 0.21  | 0.0209 | 3 | 0 | 4 | 0   |        |      |       |       |
| 0   |       |       |       |        | 7 | 2 | 4 | 5   | 0.35   | 0.25 | 0.3   | 0.354 |
| 5   |       |       |       |        | 3 | 6 | 4 | 0   |        |      |       |       |
| 2   | 0.6   | 0.37  | 0.485 | 0.0482 | 0 | 0 | 0 | 0   |        |      |       |       |
| 0   |       |       |       |        | 5 | 2 | 4 | 0   |        |      |       |       |
| 2   | 0.12  | 0.2   | 0.16  | 0.0159 | 4 | 5 | 5 | 2   | 0.25   | 0.22 | 0.235 | 0.278 |
| 3   | 63.84 | 26.04 | 44.94 | 4.4698 | 0 | 0 | 0 | 0   |        |      |       |       |
| 2   |       |       |       | 0      | 3 | 3 | 0 | 4   |        |      |       |       |
| 0   | 0.23  | 0.23  | 0.23  | 0.0229 | 3 | 2 | 3 | 3 * |        | 1.1  | 0.55  | 0.65  |
| 4 * | *     |       |       |        | 0 | 0 | 0 | 0   |        |      |       |       |
| 0   |       |       |       |        | 0 | 3 | 3 | 4   | 0.44   | 0.57 | 0.505 | 0.597 |
| 2   | 0.83  | 0.35  | 0.59  | 0.0587 | 0 | 0 | 0 | 0   |        |      |       |       |
| 0   |       |       |       |        | 4 | 5 | 2 | 7   | 0.07   | 0.26 | 0.165 | 0.195 |
| 0   |       |       |       |        | 3 | 9 | 0 | 3   |        |      |       |       |
| 0   |       |       |       |        | 0 | 2 | 2 | 3   | 0.24   | 0.55 | 0.395 | 0.467 |
| 0   |       |       |       |        | 2 | 3 | 4 | 6   | 0.2    | 0.27 | 0.235 | 0.278 |
| 0   |       |       |       |        | 2 | 4 | 3 | 0   |        |      |       |       |
| 0   |       |       |       |        | 7 | 4 | 2 | 0   |        |      |       |       |
| 0   |       |       |       |        | 3 | 3 | 3 | 0   |        |      |       |       |
| 0   |       |       |       |        | 4 | 2 | 4 | 2   | 0.51   | 0.31 | 0.41  | 0.484 |
| 0   |       |       |       |        | 3 | 2 | 4 | 0   |        |      |       |       |
| 0   |       |       |       |        | 0 | 2 | 2 | 2   | 0.85 * |      | 0.425 | 0.502 |
| 2   | 1.85  | 1.2   | 1.525 | 0.1517 | 0 | 0 | 0 | 0   |        |      |       |       |
| 0   |       |       |       |        | 2 | 4 | 4 | 2   | 0.2    | 0.12 | 0.16  | 0.189 |
| 0   |       |       |       |        | 3 | 3 | 3 | 3   | 0.03   | 0.03 | 0.03  | 0.035 |
| 0   | 0.35  | 0.16  | 0.255 | 0.0254 | 0 | 0 | 0 | 0   |        |      |       |       |
| 0   |       |       |       |        | 5 | 3 | 0 | 0   |        |      |       |       |
| 0   |       |       |       |        | 6 | 0 | 2 | 2 * |        | 0.12 | 0.06  | 0.071 |
| 0   |       |       |       |        | 3 | 0 | 2 | 2   | 1.28 * |      | 0.64  | 0.756 |
| 0   |       |       |       |        | 2 | 2 | 0 | 2   |        |      |       |       |
| 0   |       |       |       |        | 3 | 3 | 3 | 2   | 0.52 * |      | 0.26  | 0.307 |
| 0   |       |       |       |        | 4 | 2 | 4 | 0   |        |      |       |       |
| 0   |       |       |       |        | 3 | 2 | 2 | 2   | 0.15   | 0.13 | 0.14  | 0.165 |
| 0   |       |       |       |        | 4 | 3 | 2 | 0   |        |      |       |       |
| 0   |       |       |       |        | 3 | 4 | 2 | 2   | 0.08   | 0.08 | 0.08  | 0.095 |
| 0   |       |       |       |        | 4 | 2 | 0 | 3   |        |      |       |       |
| 0   |       |       |       |        | 4 | 3 | 0 | 0   |        |      |       |       |
| 0   |       |       |       |        | 2 | 2 | 2 | 0   |        |      |       |       |
| 0   |       |       |       |        | 4 | 4 | 0 | 0   |        |      |       |       |
| 0   |       |       |       |        | 2 | 2 | 0 | 0   |        |      |       |       |
| 2   | 0.59  | 0.59  | 0.59  | 0.0587 | 0 | 0 | 0 | 0   |        |      |       |       |
| 0   |       |       |       |        | 3 | 2 | 0 | 2   |        |      |       |       |
| 0   |       |       |       |        | 0 | 0 | 2 | 4 * |        | 0.21 | 0.105 | 0.124 |
